# Supplementary material for: CmMYB19 Over-Expression Improves Aphid Tolerance in Chrysanthemum by Promoting Lignin Synthesis
Source: PubMed Central journal article supplement (PMC5372634; doi:10.3390/ijms18030619), 2017-03-12
Supplement: ijms-18-00619-s001.pdf [file ijms-18-00619-s001.pdf]

**Table S1.** Primer sequences used in the present study.

| Primer        | Sequence (5'-3')                        | remark          |
|---------------|-----------------------------------------|-----------------|
| Oligo(dT)     | GACTCGAGTCGACATCGATTTTTTTTTTTTTTTTTT    | RT-PCR          |
| CmMYB19-M-F   | GCATCTGGAAGTGGTCTCACA                   |                 |
| CmMYB19-M-R   | TCAGATGTTGGTGACGAGGA                    |                 |
| CmMYB19-3-1   | CCTTCTCGGAAATAGGTGGTCT                  | 3'RACE          |
| CmMYB19-3-2   | TCCCATCTGAAGAAACGAGCA                   |                 |
| J-R           | CTGATCTAGAGGTACCGGATCC                  |                 |
| CmMYB19-5-1   | TTCAGATGGGAATGCCAATAGTT                 | 5'RACE          |
| CmMYB19-5-2   | CGAGAAGGGAATGAGAAACAAGTATG              |                 |
| AAP           | GGCCACGCGTCGACTAGTACGGGIIIGGGIIIGGGIIIG |                 |
| AUAP          | GGCCACGCGTCGACTAGTAC                    |                 |
| CmMYB19-F     | AGTAACGTACTAGCAATTGGAAC TAAGT           | Full-length     |
| CmMYB19-R     | ATTAAAGATCGTCAATGGTTCCTG                | PCR             |
| CmMYB19-KPN-F | CGGGGTACCGAATGAGAATGAAGTCTCCAAGAAGGG    | Digestion sites |
| CmMYB19-XHO-R | CCGCTCGAGTGAAGATCGTCAATGGTTCCTGGTG      | insertion       |
| CmMYB19-RT-F  | ACATTTCTCGTACCAACATCT                   | qRT-PCR         |
| CmMYB19-RT-R  | GAAACTCAAAGTCTTGTCTGTGGT                |                 |
| CmPAL1-F      | CCCCAACAGGATCAAGGCAT                    |                 |
| CmPAL1-R      | TTGTCGAACTCTTACCCGG                     |                 |
| CmC4H-F       | CTCCAAACTTCGCGGCAAAA                    |                 |
| CmC4H-R       | AGTTACGTTGACCCATGCGT                    |                 |
| Cm4CL1-F      | TTCATCGTTGACCGGCTCAA                    |                 |
| Cm4CL1-R      | TCCTCCGTCAAAGTGTGAGCC                   |                 |
| CmHCT-F       | GCCTATAGCAGTAGCCGGTG                    |                 |
| CmHCT-R       | CTTTGCCAAAGCGTCGTGAA                    |                 |
| CmC3H1-F      | CGCCAATGTCAAGGTTGGTG                    |                 |
| CmC3H1-R      | GTGGCAGGATCTCGAGCTAC                    |                 |
| CmCCoAOMT1-F  | TGGCTGCCGATCCAAGAATT                    |                 |
| CmCCoAOMT1-R  | GACTCGACGGCAAAGGGTAA                    |                 |
| CmCCR1-F      | CATTTGTGTCACCGGTGCTG                    |                 |
| CmCCR1-R      | AACGGTTCCTCGAACAGCAT                    |                 |
| CmF5H1-F      | CTTCATTGACCCCGCTGGAT                    |                 |
| CmF5H1-R      | TTTCGGCATCTTCATCGCCT                    |                 |
| CmCOMT-F      | TGTCATGACTGGAGTGACGC                    |                 |
| CmCOMT-R      | GGAAGAATGCATTCCGCGAC                    |                 |
| CmCAD6-F      | CCGATGGAATGTCTCCCGAG                    |                 |
| CmCAD6-R      | ACGTGATGTCCCATCGCTTT                    |                 |
| Hyg-F         | CGACAGCGTCTCCGACCTGAT                   |                 |
| Hyg-R         | AGATGTTGGCGACCTCGTATTG                  |                 |

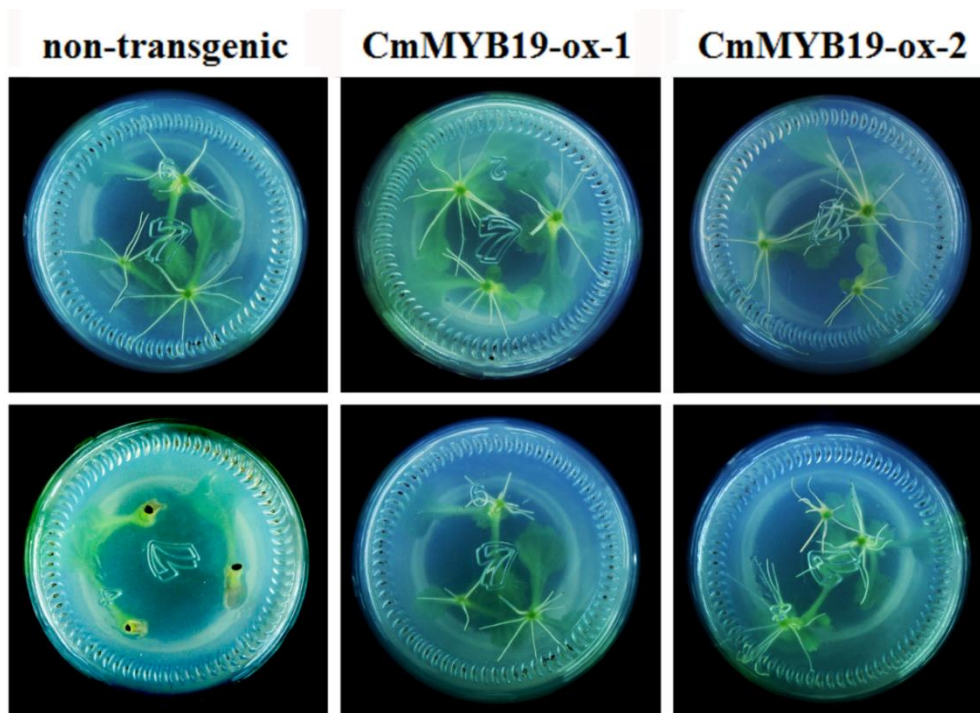

**Figure S1.** Rooting selection assay with and without hygromycin for putative transgenic and non-transgenic plants. Upper panel, MS medium without hygromycin; Lower panel, MS medium supplemented with hygromycin.

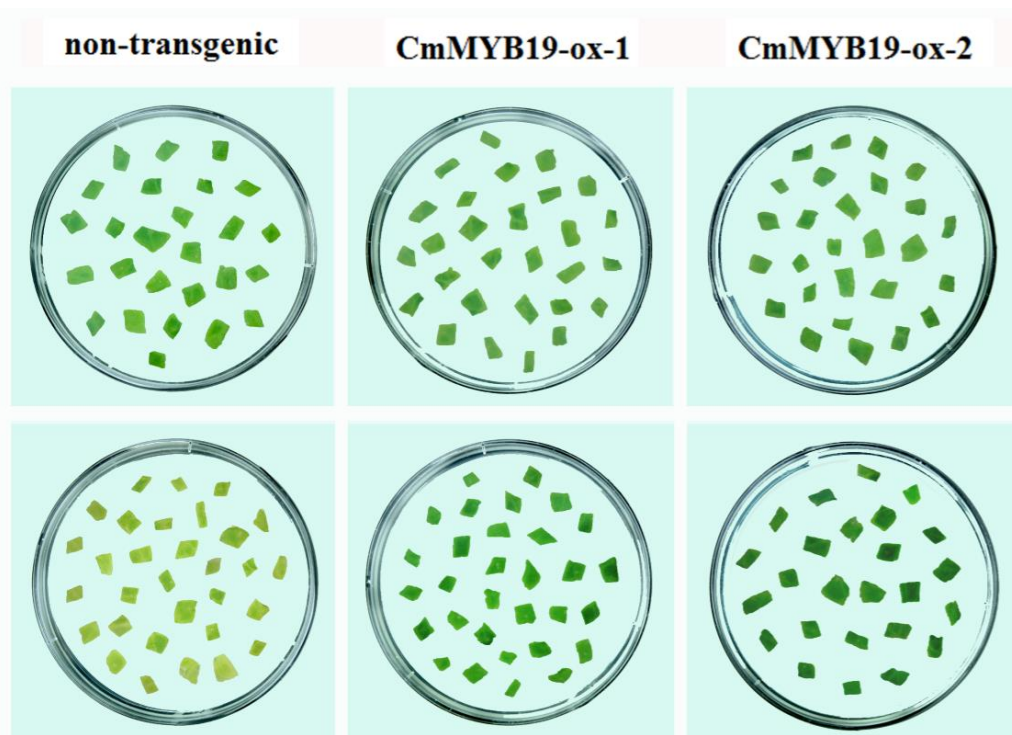

**Figure S2.** Regeneration assay with and without hygromycin selection for putative transgenic and non-transgenic plants. Upper panel, MS medium without hygromycin; Lower panel, MS medium supplemented with hygromycin. The photos were taken at 10d after inoculation.

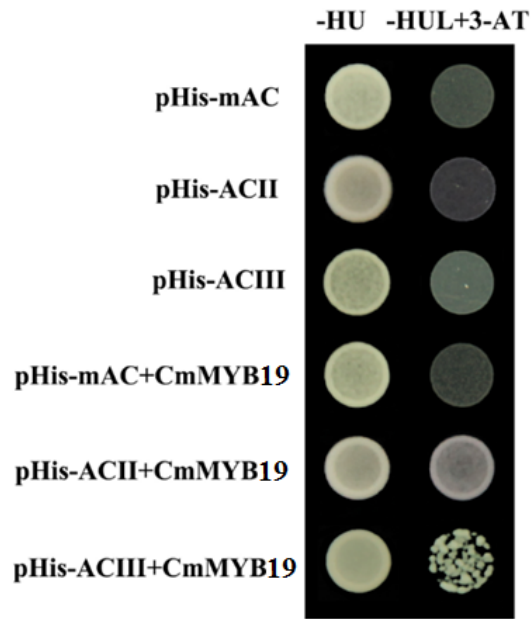

**Figure S3.** Yeast one hybrid assay for binding ability of *CmMYB19* to AC element.
